# Supplementary material for: Comparative analysis of the silk gland transcriptomes between the domestic and wild silkworms
Source: PubMed Central journal article supplement (PMC4328555; doi:10.1186/s12864-015-1287-9), 2015-02-06

# WEGO Output

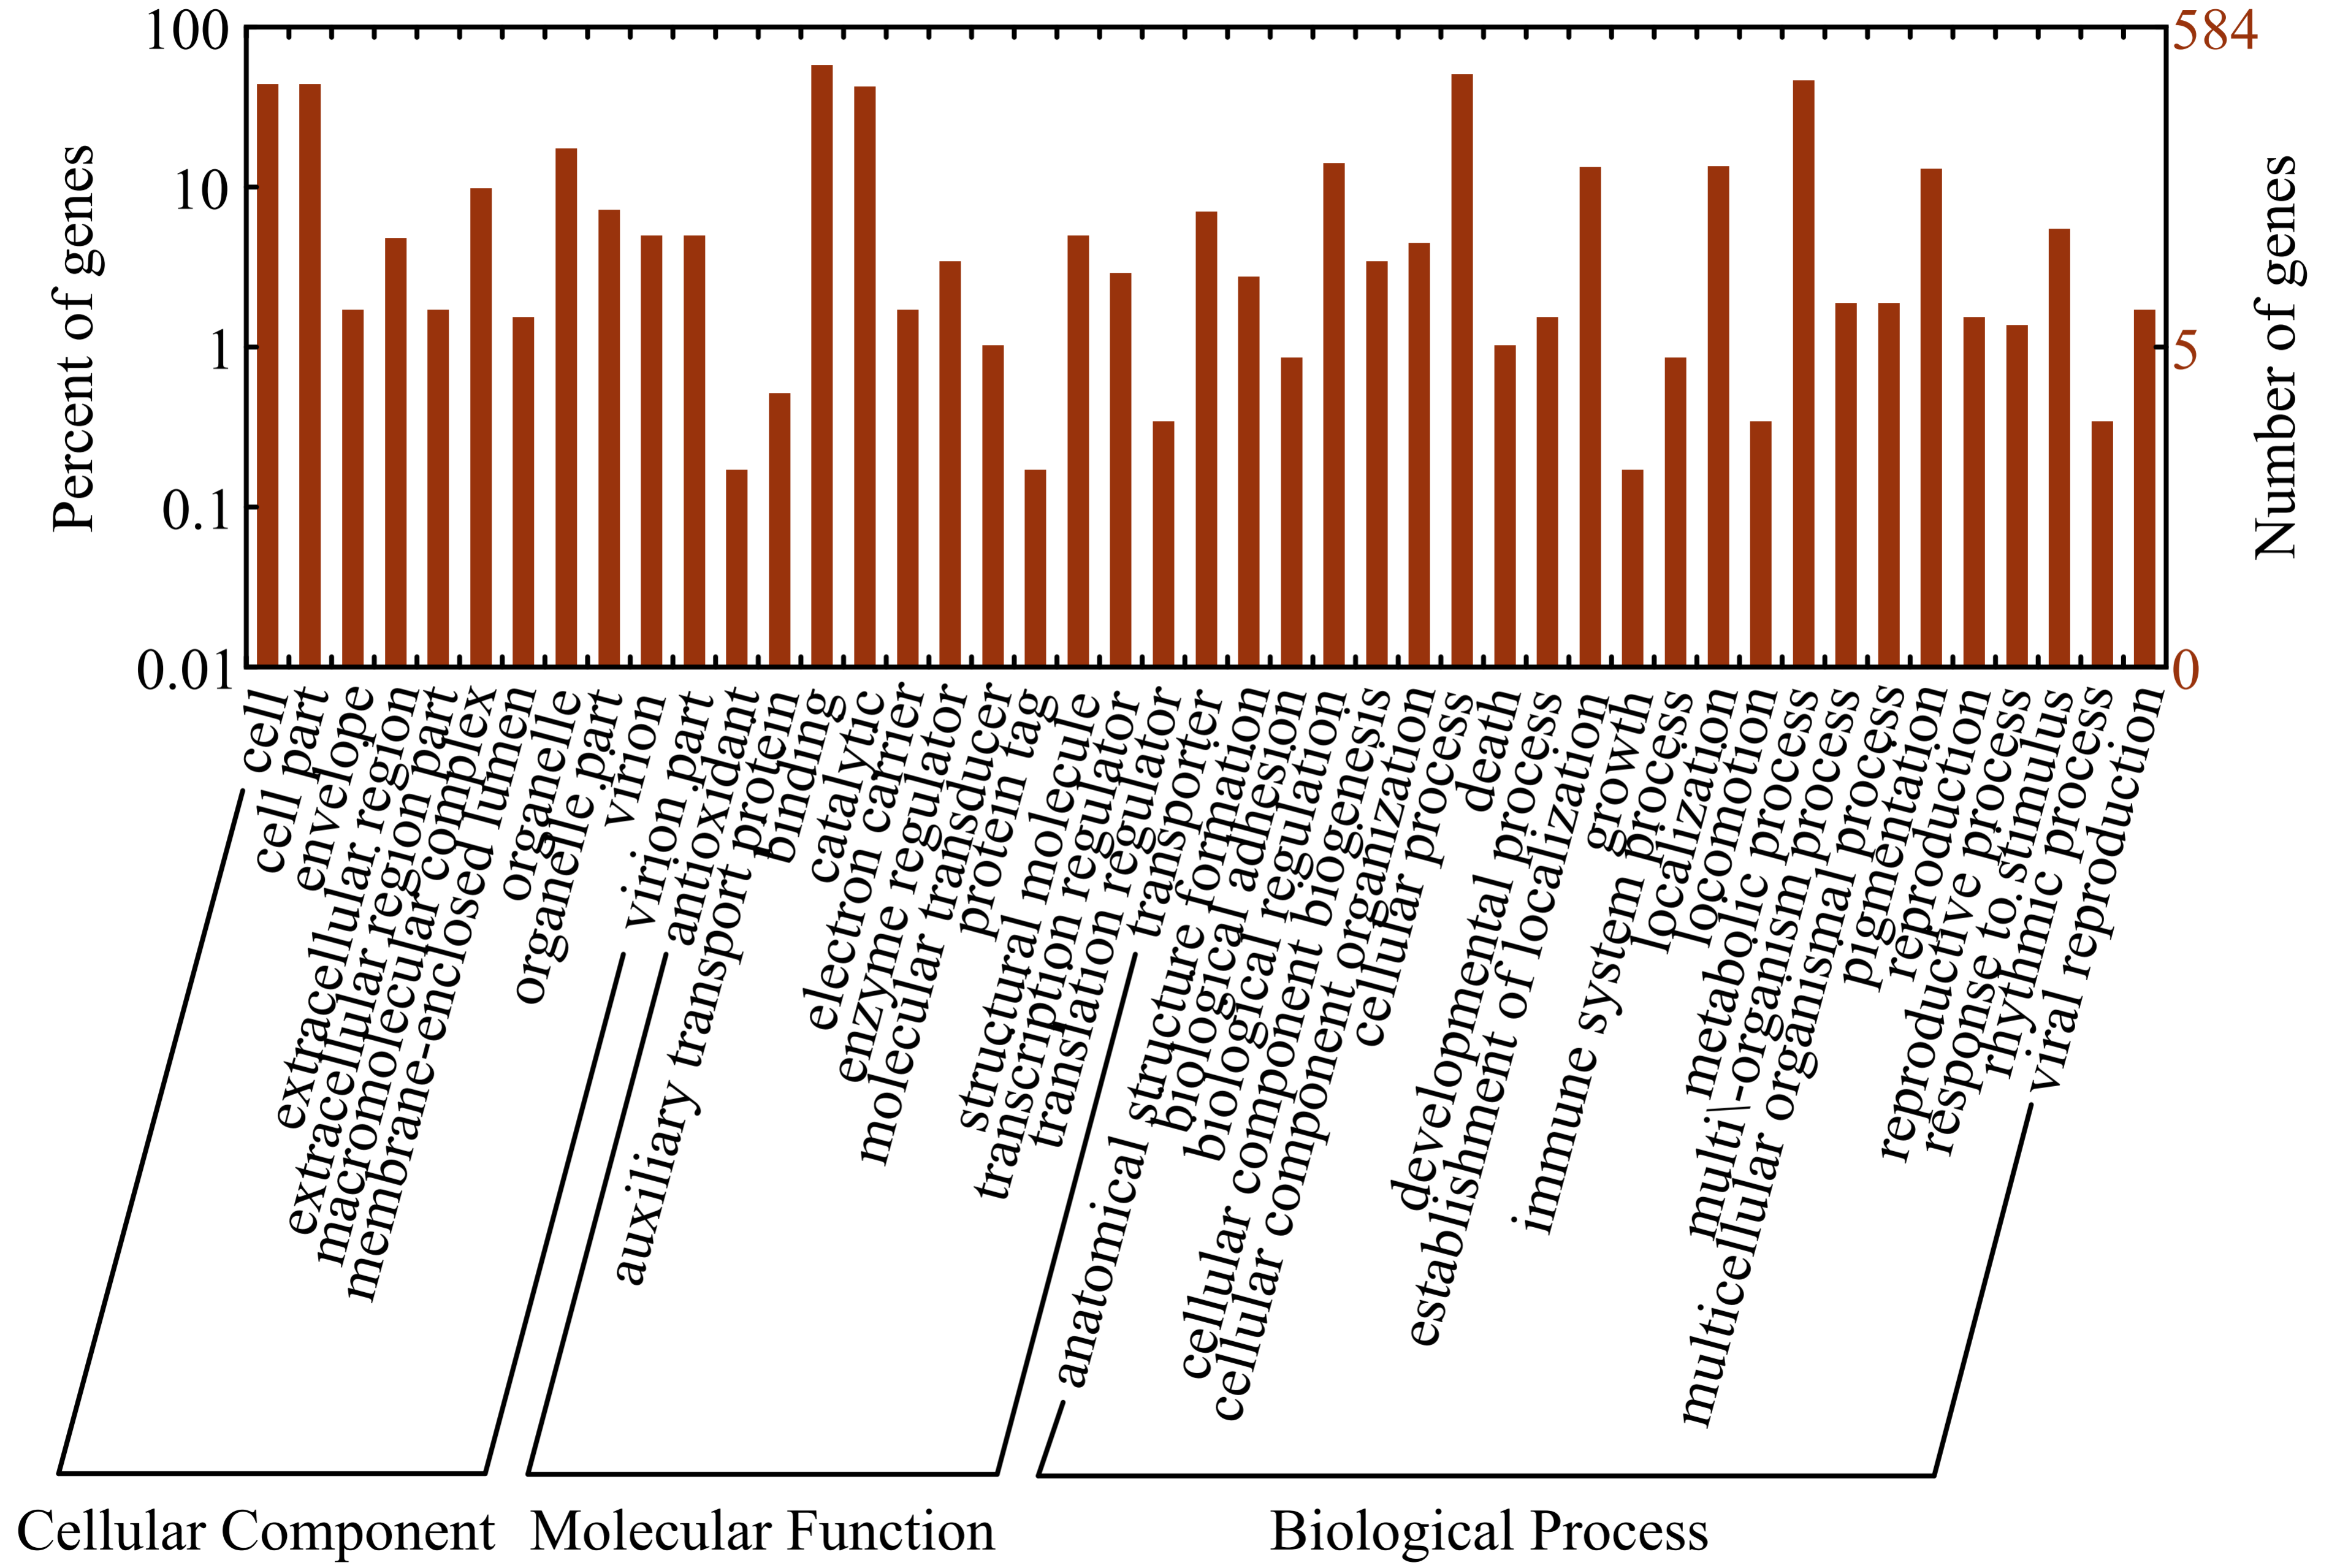

Supplement: 12864_2015_1287_MOESM4_ESM.pdf [file 12864_2015_1287_MOESM4_ESM.pdf]
